## RIM-BP2 primes synaptic vesicles *via* recruitment of Munc13-1 at hippocampal mossy fiber synapses

Marisa M Brockmann<sup>1,\*</sup>, Marta Maglione<sup>2,3,\*</sup>, Claudia G Willmes<sup>4,\*</sup>, Alexander Stumpf<sup>5</sup>, A Boris Bouazza<sup>1</sup>, Laura M Velasquez<sup>5</sup>, Marie Katharina Grauel<sup>1</sup>, Prateep Beed<sup>5</sup>, J Stephan Sigrist<sup>2,3,#</sup>, Christian Rosenmund<sup>1,#</sup> & Dietmar Schmitz<sup>4,5,#</sup>

<sup>1</sup> Institut für Neurophysiologie, Charité-Universitätsmedizin, Berlin, Germany

<sup>2</sup> Freie Universität Berlin, Institut für Biologie, Berlin, Germany

<sup>3</sup> Leibniz-Forschungsinstitut für Molekulare Pharmakologie (FMP), 13125 Berlin, Germany

<sup>4</sup> DZNE, German Center for Neurodegenerative Diseases, Berlin, Germany

<sup>5</sup> Charité – Universitätsmedizin Berlin, corporate member of Freie Universität Berlin, Humboldt-Universität zu Berlin, and Berlin Institute of Health

\* contributed equally to this work

# corresponding authors

### 1 Summary

2 All synapses require fusion-competent vesicles and coordinated Ca<sup>2+</sup>-secretion coupling for  
3 neurotransmission, yet functional and anatomical properties show a high diversity across different  
4 synapse types. We show here that the presynaptic protein RIM-BP2 has diversified functions in  
5 neurotransmitter release at different central mammalian synapses and thus contributes to  
6 synaptic diversity. At hippocampal pyramidal CA3-CA1 synapses, RIM-BP2 loss has a mild effect on  
7 neurotransmitter release, by only regulating Ca<sup>2+</sup>-secretion coupling. However, at hippocampal  
8 mossy fiber synapses RIM-BP2 has a strong impact on neurotransmitter release by promoting  
9 vesicle docking/priming *via* recruitment of Munc13-1. In wild type mossy fiber synapses, the  
10 distance between RIM-BP2 clusters and Munc13-1 clusters is larger than in hippocampal pyramidal  
11 CA3-CA1 synapses, suggesting that spatial organization may dictate the role a protein plays in  
12 synaptic transmission and that differences in active zone architecture is a major determinant factor  
13 in the functional diversity of synapses.

14

15

16

17

18

## 19 Introduction

20 Across all types of synapses, vesicle fusion is coordinated by an evolutionarily conserved set of  
21 vesicular and active zone proteins<sup>1</sup>. One hallmark of synapses is their functional heterogeneity:  
22 indeed, synapses can exhibit high or low transmission fidelity and this diversity results in  
23 synapse-specific differences in response fluctuation and short-term plasticity<sup>2,3</sup>. In recent years,  
24 functional synaptic diversity has been found to be critical for routing and encoding sensory  
25 information within networks of neurons in the brain<sup>4</sup>. Functional synaptic diversity has been  
26 observed both within and across brain regions, and it has been shown to play a major role in  
27 temporal coding of multisensory integration and extraction of specific sensory features<sup>1-4</sup>. Still, the  
28 molecular origin of this heterogeneity is largely unknown, and analysis of genotype-phenotype  
29 differences across species and brain tissue have just started to uncover key molecular principles  
30 responsible for synaptic diversity, emphasizing the importance of abundance and isoforms  
31 differences across species for synaptic diversity<sup>5-8</sup>.

32 It is possible, but largely untested whether the active zone architecture, which is specialized  
33 throughout synapse types, is associated with distinct protein functions and thus contributes to  
34 synaptic diversity. Here, RIM-binding proteins (RIM-BPs) are particularly interesting, as their loss  
35 manifests in severe phenotypes in the drosophila neuromuscular junction (NMJ)<sup>9</sup>, but rather subtle  
36 phenotypes in small central murine synapses, the Calyx of Held or the ribbon synapse with only mild  
37 impairments in Ca<sup>2+</sup>-channel-release site coupling<sup>10-12</sup>. Drosophila NMJ and small central synapses are  
38 considerable distinct in their anatomical, ultrastructural and, physiological properties<sup>13</sup>.

39 To understand whether the RIM-BP2 phenotypes described so far are species or synapse type  
40 dependent, we chose to examine RIM-BP2 function at mouse hippocampal mossy fiber (MF)  
41 synapses, a mammalian synapse with distinct physiologically and anatomically properties. Notably,  
42 MF synapses strongly facilitate but possess multiple release sites<sup>14</sup>.

43 Our recordings in acute hippocampal brain slices revealed that neurotransmission at MF synapses is  
44 severely impaired upon the loss of RIM-BP2, compared to that at CA3-CA1 synapses. Furthermore,  
45 we also show that RIM-BP2 loss leads to a defective recruitment of Munc13-1 to the active zone  
46 specifically at MF synapses, but not at CA3-CA1 synapses, indicative of diversified functions of  
47 RIM-BP2 at these two synapse types. While at CA3-CA1 synapses RIM-BP2 maintains high fidelity  
48 coupling of Ca<sup>2+</sup>-channels to release sites, at MF synapses RIM-BP2 is required for proper docking and  
49 priming of synaptic vesicles to release sites, a yet undescribed function. Finally, our analysis of the  
50 active zone architecture reveals that RIM-BP2 and Munc13-1 clusters as well as RIM1 and Cav2.1  
51 clusters are positioned at increased distances in MF synapses compared to that in CA3-CA1 synapses,  
52 demonstrating that these synapses utilize different architectural organizational principles.

53

## 54 **Results**

### 55 **Distinct role of RIM-BP2 at hippocampal synapses**

56 To probe the nature of diversity between central mammalian synapses, we examined the role of  
57 RIM-BP2 throughout the hippocampus. Immunostainings for RIM-BP2 in mouse hippocampal slices  
58 revealed RIM-BP2 expression in the whole hippocampal neuropil, with a strong labeling of the  
59 mossy-fiber layer band in stratum lucidum of area CA3 (Fig. 1a).

60 To examine the functional impact of loss of RIM-BP2 at different hippocampal synapses, we recorded  
61 field excitatory postsynaptic potentials (fEPSPs) in acute brain slices obtained from RIM-BP2 KO mice.  
62 To ensure MF origin, we verified input sensitivity to group II metabotropic glutamate receptor  
63 (mGluR) agonist DCG IV<sup>15</sup>. The ratio of fEPSP to presynaptic fiber volley (PFV) was drastically reduced  
64 when stimulating the MF pathway in RIM-BP2 deficient (KO) slices compared to that in wildtype (WT)  
65 slices (Fig. 1b). This shows that neurotransmission is severely impaired at RIM-BP2 KO MF synapses.  
66 Additionally, we found that 1 Hz facilitation was significantly enhanced at MF synapses from RIM-BP2  
67 deficient mice, suggesting a role for RIM-BP2 in short-term plasticity at the MF synapse (Fig. 1c). In  
68 contrast, the ratio of fEPSP to presynaptic fiber volley (PFV) for associative commissural (AC)-fibers  
69 and Schaffer collaterals (SC), both representing small central synapses, were not affected by loss of  
70 RIM-BP2 (Fig. 1d). Thus, RIM-BP2 deletion specifically impairs neurotransmitter release at  
71 hippocampal MF synapses, compared to AC and SC synapses.

72

### 73 **RIM-BP2 deletion does not alter Ca<sup>2+</sup>-channel localization at the MF synapse**

74 Given that RIM-BP2 contributes to the coupling of Ca<sup>2+</sup>-channels and release apparatus in CA3-CA1  
75 synapses<sup>10,11</sup>, we speculated that a mislocalization of Ca<sup>2+</sup>-channels in RIM-BP2 KO MF synapses  
76 might contribute to the severe phenotype in neurotransmission (Fig. 1). To test this hypothesis, we  
77 determined the position of clusters formed by the P/Q type Ca<sup>2+</sup>-channel subunit Ca<sub>v</sub>2.1 relative to  
78 clusters formed by the active zone protein RIM1, and the postsynaptic scaffold Homer1 in RIM-BP2  
79 WT and KO MF synapses using super-resolution time-gated stimulated emission depletion (gSTED) *in*  
80 *situ*. However, RIM-BP2-deficient MF synapses exhibited no difference in the number of Ca<sup>2+</sup>-channel  
81 clusters, (Fig. 2a-c) or in the distance between Ca<sub>v</sub>2.1 and RIM1 as compared to WT (Fig. 2d).  
82 Therefore, the strong defect in neurotransmitter release in RIM-BP2 KO MF synapses is not due to a  
83 delocalization of Ca<sup>2+</sup>-channels.

84

### 85 **MF synapses and CA3-CA1 synapses display differences in their active zone protein architecture**

86 Given that RIM-BP2 KO does not alter Ca<sup>2+</sup>-channel localization at MF synapses but strongly  
87 decreases neurotransmitter release, we hypothesized that RIM-BP2 deletion might alter the  
88 abundance or localization of other presynaptic scaffold proteins at MF synapses. To test this

89 hypothesis we performed a more detailed analysis of the positioning of scaffold protein clusters at  
90 WT MF synapses using gSTED. Interestingly, at WT MF synapses, the distance between RIM1 clusters  
91 and Ca<sub>v</sub>2.1 clusters was more than 35% larger ( $254 \pm 27$  nm) (Fig. 2d) than what we previously found  
92 at WT CA3-CA1 synapses<sup>11</sup>. In separate experiments, we also determined the localization of RIM-BP2  
93 clusters relative to clusters of the priming/docking factor Munc13-1 and the scaffold protein  
94 Bassoon. Again, at WT MF synapses Munc13-1 clusters were positioned at increased distances ( $174 \pm$   
95  $20$  nm) from RIM-BP2 clusters (Fig. S1a, b) than what we previously observed at CA3-CA1 synapses  
96 ( $115 \pm 5$  nm)<sup>11</sup>. Our results support the idea that MF synapses display a distinct active zone  
97 organization compared to CA3-CA1 synapses. These findings indicate that RIM-BP2 differentially  
98 impacts on neurotransmission at these two synapse types, possibly resulting from differences in their  
99 active zone protein architecture.

100

### 101 **RIM-BP2 docks synaptic vesicles *via* the specific recruitment of Munc13-1 at MF synapses**

102 To investigate the possible mechanisms leading to the severe phenotype observed in RIM-BP2  
103 deficient MF synapses, we compared the relative localization and abundance of the priming factor  
104 Munc13-1 and Ca<sub>v</sub>2.1 clusters in RIM-BP2 WT and KO brain slices by using gSTED. We found a drastic  
105 reduction in Munc13-1 cluster number (Fig. 3a-d), accompanied with an increased distance between  
106 Munc13-1 and Ca<sub>v</sub>2.1 clusters in RIM-BP2 deficient MF synapses compared to WT MF synapses  
107 (Fig. 3e,f), parameters which were unaltered in CA3-CA1 synapses (Fig. 3g-l). We also analyzed the  
108 relative distribution and abundance of Munc13-2 relative to Cav2.1 clusters at both MF and CA3-CA1  
109 synapses. In both synapses, loss of RIM-BP2 neither altered the levels nor the distribution of  
110 Munc13-2 relative to Cav2.1 channels (Fig. S2). Therefore, RIM-BP2 is needed specifically in MF  
111 synapses to stabilize Munc13-1 at the active zone.

112 The major role of Munc13-1 is to dock and prime vesicles at the active zone<sup>16,17</sup>. To explore whether  
113 the loss of Munc13-1 at RIM-BP2 deficient MF synapse affected vesicle docking, we performed high-  
114 pressure cryo-fixation of acute hippocampal slices from WT and RIM-BP2 deficient animals and  
115 analyzed MF active zone structures by using transmission electron microscopy (EM). Indeed, EM  
116 images of RIM-BP2 deficient MF synapses exhibited a nearly 50% reduction in docked vesicles and a  
117 reduction in vesicle number within 30 nm from the active zone membrane (Fig. 4a,b), whereas the  
118 number of docked vesicles in CA1 synapses was unaltered (Fig. 4c,d). Thus, in contrast to CA3-CA1  
119 synapses, MF synapses require RIM-BP2 dependent stabilization of Munc13-1 at the active zone to  
120 dock synaptic vesicles.

121

122

123

## 124 **Loss of RIM-BP2 impairs vesicle priming and release efficiency in granule autaptic neurons**

125 To identify the molecular mechanism of RIM-BP2 function in MF synapses, we prepared autaptic  
126 cultures of hippocampal granule cells that form synaptic contacts only with themselves and therefore  
127 allow the quantitative analysis of synaptic input-output properties. It is important to note that  
128 cultured granule cells, like those in acute hippocampal brain slice, form MF like boutons as assessed  
129 by EM analysis (Fig. S3a). Additionally, autaptic granule cells are sensitive to DCG IV and thus can be  
130 pharmacologically identified (Fig. 5a,b S3). This shows that many aspects of the hippocampal granule  
131 cell identity, including the gross MF synapse structure and presynaptic mGluR2 expression, are likely  
132 to be intrinsically encoded and independent of post-synaptic targets.

133 Next, we wanted to test whether autaptic granule neurons show the same level of reduction in  
134 neurotransmitter release upon RIM-BP2 loss and thus whether they can be used as a model system  
135 for studying differences between the active zone protein architectures of diverse synapse types.  
136 Consistent with the findings from hippocampal field recordings (Fig. 1), evoked excitatory  
137 postsynaptic currents (EPSCs) were severely impaired in RIM-BP2 KO granule cell autapses compared  
138 to that in WT autapses (Fig. 5a,b). Rescue of RIM-BP2 deficiency by lentiviral expression in RIM-BP2  
139 KO neurons completely restored synaptic transmission, confirming the specificity of RIM-BP2  
140 function at these synapses (Fig. 5a,b). To examine the origin of the impaired evoked response, we  
141 first probed vesicle priming by measuring the readily releasable pool (RRP) *via* hypertonic sucrose  
142 solution application. In line with the finding that RIM-BP2 KO MF synapses had only half the number  
143 of docked vesicles compared to that in WT neurons (Fig. 4), the size of the RRP was reduced by 50 %  
144 as well (Fig. 5c,d). The frequency and amplitude of  $\text{Ca}^{2+}$ -independent release events as measured by  
145 recording spontaneous miniature EPSCs (mEPSCs) was not significantly altered upon RIM-BP2 loss  
146 (Fig. 5g,h). Next, we investigated the paired-pulse ratio (PPR), a sensitive indicator of changes in  
147 release probability, and found that RIM-BP2 KO neurons displayed slightly enhanced facilitation  
148 compared to WT neurons (Fig. 5e,f). Furthermore, EPSCs evoked by 10 Hz action potential trains  
149 displayed less depression over the 5s train duration in RIM-BP2 KO granule cell autapses compared  
150 to WT or rescue groups (Fig. S4). Thus, using an additional model system, we could validate our initial  
151 findings and demonstrate that loss of RIM-BP2 leads to impaired hippocampal granule cell output,  
152 due to changes in both vesicle priming and release efficacy.

153

## 154 **RIM-BP2 primes synaptic vesicles *via* Munc13-1 in granule autaptic neurons**

155 Our gSTED imaging experiments revealed a decrease in synaptic Munc13-1 localization upon the loss  
156 of RIM-BP2 (Fig. 3). In small central synapses, priming is attained by an interaction of Munc13 and  
157 RIM *via* the Munc13 C<sub>2</sub>A domain, which can be mimicked by the constitutively monomeric mutant  
158 Munc13-K32E lacking Munc13-1 homodimerization<sup>18</sup>. We therefore examined whether the priming

159 deficit observed in RIM-BP2-deficient MF synapses could be rescued by restoring Munc13 function by  
160 expression Munc13-1 WT (M13<sup>WT</sup>) or the constitutively monomeric Munc13-1 mutant (M13<sup>K32E</sup>)<sup>19</sup>.  
161 Remarkably, Munc13-K32E expression in RIM-BP2 KO granule neurons sufficed to rescue vesicle  
162 priming and Ca<sup>2+</sup>-evoked neurotransmission (Fig. 6), whereas Munc13-1 WT was not sufficient to  
163 rescue the RIM-BP2 KO phenotype (Fig.6). This suggests that in MF synapses, unlike hippocampal  
164 pyramidal neuron synapses, the recruitment of active monomeric Munc13 is RIM-BP2 dependent.

165

## 166 Discussion

167 Chemical synapses have been highly diversified by evolution in their molecular composition,  
168 ultrastructure, and consequently function. In the last decades, presynaptic diversity was studied in  
169 synapses that exhibit ultrastructural differences, such as the T-bar structure in the neuromuscular  
170 junction of *Drosophila melanogaster* or the ribbon synapse of vertebrate photoreceptor cells<sup>13</sup>.  
171 Ultrastructural diversity is often associated with the expression of specialized synaptic organizers,  
172 like Bruchpilot or RIBEYE, which shape presynaptic structure and function<sup>13,20,21</sup>. More recently, the  
173 heterogeneity of distinct synapses came into focus, since many central synapses seemingly express  
174 similar presynaptic proteins but still show distinct release probabilities and Ca<sup>2+</sup>-secretion coupling.  
175 Synaptic heterogeneity might be achieved by several mechanisms, including variation in the  
176 abundance of single proteins or expression of different protein isoforms. Notably, a contribution of  
177 the exact nanoscale arrangement of proteins at active zones to synaptic diversity has also been  
178 discussed<sup>2,22</sup>.

179 To understand the function of a given protein in neurotransmitter release, one can compile the  
180 results from protein knockouts in diverse synapses and extract a universal function. Some highly  
181 preserved proteins, like Munc13-1, are essential for neurotransmitter release in a variety of  
182 synapses, since they exclusively conduct one specific function, in this case vesicle priming<sup>17,23-25</sup>.  
183 However, many other presynaptic proteins show distinct knockout phenotypes for diverse synapses,  
184 like RIM-BPs. In small central synapses, the calyx of Held, and inner ear hair cells, RIM-BP2 deletion  
185 has rather minor effects on neurotransmitter release, which results only from a mild loosening of the  
186 coupling between Ca<sup>2+</sup>-channels and synaptic vesicles<sup>10,11,26</sup>. Strikingly, we now show that in large MF  
187 synapses, RIM-BP2 deletion strongly impairs neurotransmitter release due to an essential role of  
188 RIM-BP2 in recruiting Munc13-1 to the active zone and thereby promoting vesicle docking and  
189 priming. Therefore, RIM-BP2 function seems as diverse as the synapse type where it is expressed.

190 Why does RIM-BP2 function differ between hippocampal CA3-CA1 and MF synapses? Due to known  
191 differences in their anatomy and nanodomain coupling of Ca<sup>2+</sup>-channel<sup>14,27</sup>, one might speculate that  
192 different nanoscale arrangements in the active zone of CA3-CA1 and MF synapses might contribute  
193 to synaptic diversity. Indeed, here we show that under normal conditions the distances between the

194 presynaptic scaffold protein clusters of RIM1 and Cav2.1, as well as between RIM-BP2 clusters and  
195 Munc13-1 clusters are increased in MF synapses compared to CA3-CA1 synapses.

196 Loss of RIM-BP in the drosophila NMJ displays a very severe phenotype, including impairment of  
197 synaptic vesicle docking and Ca<sup>2+</sup>-channel mislocalization<sup>9</sup>. In the mammalian hippocampus, these  
198 distinct functions of RIM-BP2 are differentially partitioned at two synapse types. Whereas RIM-BP2  
199 deletion in CA3-CA1 synapses alters short-term synaptic plasticity by mild alterations in Ca<sup>2+</sup>-channel  
200 localization<sup>11</sup>, loss of RIM-BP2 at MF synapses reduced vesicle docking and priming due to a severe  
201 reduction in synaptic Munc13-1 protein levels. Importantly, in RIM-BP2 KO, we detected no  
202 significant change in Ca<sup>2+</sup>-channel localization at MF synapses, whereas Munc13-1 abundance and  
203 vesicle docking were unaffected in CA3-CA1 synapses. These results suggest that the protein  
204 structure of RIM-BP2 intrinsically encodes two different functions: Ca<sup>2+</sup>-channel localization and  
205 vesicle docking/priming *via* Munc13-1, two functions emerging in distinct active zone architectures.  
206 Therefore, the protein's synaptic context seems important in determining the exact protein function.  
207 It will be of interest to see whether and through which molecular mechanism loss of RIM-BP2 alters  
208 the function of other mammalian synapses as well.

209 In mammalian synapses and drosophila NMJ, RIM-BPs have been shown to interact with  
210 Ca<sup>2+</sup>-channels<sup>9,26</sup>. While we previously observed mislocalization of Cav2.1 clusters within the AZ of  
211 CA3-CA1 synapses upon the loss of RIM-BP2, at MF synapses the closest distance at which Cav2.1  
212 clusters are found relative to RIM1 and Homer1 clusters was unchanged. This possibly indicates that  
213 RIM-BP2 is not required to fine-tune Ca<sup>2+</sup>-channel localization at MF synapses. Interestingly, CA3-CA1  
214 synapses are tight-coupled synapses<sup>28</sup>, whereas MF synapse depict loose Ca<sup>2+</sup>-channel release site  
215 coupling<sup>27</sup>, suggesting that RIM-BP2 might play different roles in Ca<sup>2+</sup>-secretion coupling at these two  
216 synapse types.

217 In CA3-CA1 synapses vesicle priming is accomplished by the interaction of RIM and Munc13-1<sup>18,29</sup>,  
218 which is not affected by the deletion of RIM-BP2<sup>11</sup>. However at MF synapses, RIM-BP2 deletion  
219 results in a severe reduction in synaptic Munc13-1 but not Munc13-2 protein levels and likely, as a  
220 direct consequence, provokes a deficit in vesicle docking and priming. These results indicate that  
221 RIM-BP2 promotes vesicle priming at MF synapses specifically *via* Munc13-1. The RIM-BP2  
222 phenotype, which we describe here is similar to the knockout of Munc13-2 at MF synapses<sup>30</sup>.  
223 Nevertheless, in RIM-BP2 KO MF synapses, Munc13-2 levels as well as its localization to the  
224 Ca<sup>2+</sup>-channels are seemingly unaltered, indicating that at MF synapses RIM-BP2 is specifically  
225 required for Munc13-1 dependent vesicle priming.

226 One explanation for why RIM-BP2 is crucial for neurotransmitter release at MF synapses could be  
227 that due to increased distances between the scaffold proteins at MF terminals, the MF active zone  
228 requires additional protein interactions to sufficiently prime synaptic vesicles. RIM1 is known to

229 interact with Munc13-1 and RIM-BP2, while at the same time RIM-BP2 has been reported to directly  
230 interact with RIM1 and Bassoon<sup>26,31,32</sup>. Additionally, we previously have shown that Munc13-1  
231 co-immunoprecipitates with RIM-BP2 from synaptosome preparation, suggesting that these proteins  
232 act in the same protein complex<sup>11</sup>. Therefore, RIM-BP2 promotes Munc13-1 localization *via* RIM.  
233 Interestingly, RIM-BP2 function is obviously still dependent on RIM activity, since the overexpression  
234 of Munc13-1 K32E<sup>18</sup>, the constitutively active form of Munc13-1, but not Munc13-1 WT rescued the  
235 RIM-BP2 KO phenotype at MF synapses. Hence, the loss of RIM-BP2 at MF synapses reveals a  
236 hierarchical interaction between RIM-BP2, RIM1 and MUNC13-1, where RIM-BP2 recruits RIM1,  
237 which in turn monomerizes Munc13-1 to build the priming complex for synaptic vesicles. Our data  
238 suggest that RIM-BP2 increases the affinity for RIM to Munc13-1 and consequently stabilizes  
239 Munc13-1 at presynaptic active zones. Notably, RNA-seq analysis points towards lower RIM1 levels at  
240 MF synapses than at CA3-CA1 synapses<sup>33</sup>. Therefore, stabilization of RIM1 *via* RIM-BP2 might be  
241 more important at MF synapses.

242 We see two possibilities for why RIM-BP2 function is redundant for CA3-CA1 synapse  
243 neurotransmitter release: On the one hand, RIM-BP2 might be substituted by another protein and  
244 therefore possess a molecular redundancy. On the other hand, it might be structurally redundant, if  
245 the synaptic zone architecture itself at CA3-CA1 synapses enhances the affinity of RIM1 and  
246 Munc13-1 as a priming complex and is therefore RIM-BP2 independent. In any case, the functional  
247 hierarchy of the triple complex formed by RIM-BP2/RIM1/Munc13-1 is fundamentally different  
248 between CA3-CA1 and MF synapses. At MF synapses RIM-BP2 acts first to stabilize RIM1/Munc13-1  
249 at the active zone, whereas at CA3-CA1 synapses, RIM-BP2 impacts synaptic function after  
250 RIM/Munc13-1 primes vesicles at the active zone.

251 Whereas RIM-BP function is essential for both Ca<sup>2+</sup>-secretion coupling and docking at the drosophila  
252 NMJ<sup>9</sup>, it seems that at hippocampal synapses, RIM-BP2 has diversified functions that seem to depend  
253 on the exact composition of the respective active zone. So far, factors determining synaptic diversity  
254 remain largely unknown. Importantly, we could show that MF synapses form in autaptic culture and  
255 maintain their functional properties. This suggests that yet unknown active zone super-organizers,  
256 such as scaffold proteins, intrinsically encode the diversity of synapse function, independently from  
257 the post-synaptic partner. Therefore, we propose that proteins, which are not absolutely essential  
258 for vesicular release in small central synapses, for example Liprins or SYD-1, may contribute to  
259 synaptic diversity and should be of particular interest for future studies.

260  
261  
262  
263  
264  
265



## 266 **Material and Methods**

### 267 **KO Mouse Generation.**

268 RIM-BP2 KO mouse generation and genotyping was performed as described previously<sup>11</sup>. All animal  
269 experiments were approved by the animal welfare committee of Charité Universitaetsmedizin Berlin  
270 and the Landesamt für Gesundheit und Soziales Berlin and carried out under the license (Berlin State  
271 Government, T0410/12; T0100/03).

272

### 273 **Slice Preparation and Electrophysiological Recordings.**

274 Acute hippocampal slices were prepared as described previously<sup>11</sup>. In brief, RIM-BP2 KO mice and  
275 wild-type littermates of both sexes (4–8 weeks) were anesthetized with Isoflurane and decapitated.  
276 The brain was quickly removed and chilled in ice-cold sucrose-artificial cerebrospinal fluid (sACSF)  
277 containing (in mM): 50 NaCl, 25 NaHCO<sub>3</sub>, 10 glucose, 150 sucrose, 2.5 KCl, 1 NaH<sub>2</sub>PO<sub>4</sub>, 0.5 CaCl<sub>2</sub>,  
278 and 7 MgCl<sub>2</sub>. All solutions were saturated with 95% (vol/vol) O<sub>2</sub>/5% (vol/vol) CO<sub>2</sub>, pH 7.4.

279 Slices (300 μm, sagittal or horizontal) were cut with a Leica VT1200S microtome (Wetzlar, Germany)  
280 and stored submerged in sACSF for 30 min at 35 °C and subsequently stored in ACSF containing (in  
281 mM): 119 NaCl, 26 NaHCO<sub>3</sub>, 10 glucose, 2.5 KCl, 1 NaH<sub>2</sub>PO<sub>4</sub>, 2.5 CaCl<sub>2</sub> and 1.3 MgCl<sub>2</sub> saturated with  
282 95% (vol/vol) O<sub>2</sub>/5% (vol/vol) CO<sub>2</sub>, pH 7.4, at RT. Experiments were started 1 to 6 h after the  
283 preparation.

284 Experiments were conducted in parallel on a comparable number of slices from WT and KO animals  
285 prepared at the same experimental day for at least 3 times (biological replicates). Technical  
286 replicates were obtained for evoked responses and averaged.

287 For recordings, slices were placed in a recording chamber continuously superfused with ACSF at RT at  
288 a rate of 2.5 ml/min. fEPSPs were evoked by electrical stimulation with patch pipettes filled with  
289 ACSF. fEPSPs were recorded with a low-resistance patch-pipette filled with ACSF. Recordings were  
290 performed with a MultiClamp 700B amplifier. Signals were filtered at 2 kHz and digitized (BNC-2090;  
291 National Instruments Germany GmbH) at 10-20 kHz. Igor Pro software was used for signal  
292 acquisition (WaveMetrics, Inc.).

293 For Mossy fiber recordings, stimulation electrodes were placed in the granule cell layer or in the hilus  
294 region. Mossy fiber origin of recorded signals was verified by frequency facilitation >400% when  
295 stimulus frequency was changed from 0.05 to 1 Hz and a complete block of responses upon DCG IV  
296 (1 μM; Tocris) application at the end of each experiment. fEPSPs in area CA1 were recorded in  
297 stratum radiatum after stimulation of the Schaffer collaterals. fEPSPs of associative commissural  
298 fibers in area CA3 were recorded in stratum radiatum after stimulation electrodes were placed in  
299 stratum radiatum, in the presence of DCG IV (1 μM) to avoid mossy fiber contamination. fEPSP  
300 magnitude was determined by analyzing ± 2 ms of the amplitude peak. Data were analyzed with the  
301 Igor plug-in NeuroMatic ([neuromatic.thinkrandom.com](http://neuromatic.thinkrandom.com)) software. Recordings were only analyzed if  
302 the fiber volley remained constant throughout the recording. Statistical analysis was performed with  
303 Prism 6 (GraphPad Software).

304

### 305 **Autaptic Granule Cell Culture.**

306 Autaptic cultures of Dentate Gyrus Granule cells were prepared as described previously<sup>34</sup>. In brief,  
307 the dentate gyrus of P0-P1 RIM-BP2 WT and KO embryos was separated from the hippocampus.  
308 After digestion with Papain and trituration, cells were plated on astrocytic micro-islands<sup>35</sup>. Neurons  
309 were incubated at 37°C for 14-20 days before the electrophysiological characterization was  
310 performed. For rescue experiments, neurons were transduced with lentiviruses 24 hours after  
311 plating.

312

### 313 **Lentiviral Constructs.**

314 Lentiviral constructs used in this study were based on the FUGW vector<sup>36</sup>. The cDNA from mouse  
315 RIM-BP2 (NM\_001081388) and from rat *Unc-13a* (NM\_022861)<sup>19</sup> were cloned into an lentiviral  
316 shuttle vector after a NLS-GFP-P2A or NLS-GFP-P2A under the control of a human *synapsin-1*  
317 promoter. The expression of nuclear RFP or GFP allows to identify transduced neurons. All

318 lentiviruses were provided from the Viral Core Facility of the Charité Berlin and prepared as  
319 described before<sup>36</sup>.  
320

### 321 **Electrophysiological Recordings of Autaptic Neurons.**

322 To pharmacologically identify autaptic granule cells, DCG IV (1 $\mu$ m) was washed in after each  
323 experiment. Only cells where synaptic transmission was inhibited by approximately 70 % were  
324 considered for analysis<sup>34</sup>.

325 Whole-cell patch-clamp recordings in autaptic neurons were performed as described previously<sup>11</sup>  
326 at 13–21 days *in vitro* (DIV) with a Multiclamp 700B amplifier (Molecular Devices). Data were  
327 acquired from at least 3 different cultures (biological replicates). To minimize variability in  
328 recordings, about the same number of autapses were recorded from each experimental group each  
329 day. Technical replicates were obtained for evoked responses and averaged. Data were normalized  
330 to the mean value of the control group of each culture.

331 The patch pipette solution contained the following (in mM): 136 KCl, 17.8 HEPES, 1 EGTA, 4.6 MgCl<sub>2</sub>,  
332 4 Na<sub>2</sub>ATP, 0.3 Na<sub>2</sub>GTP, and 12 creatine phosphate, and 50 U/ml phosphocreatine kinase (300 mOsm;  
333 pH 7.4). The recording chamber was constantly perfused with extracellular solution containing  
334 140 mM NaCl, 2.4 mM KCl, 10 mM Hepes, 2 mM CaCl<sub>2</sub>, 4 mM MgCl<sub>2</sub>, and 10 mM glucose (pH  
335 adjusted to 7.3 with NaOH, 300 mOsm). Solutions were applied using a fast-flow system. Data were  
336 filtered at 3 kHz, digitized at 10 kHz, and recorded with pClamp 10 (Molecular Devices). Data were  
337 analyzed offline with Axograph X (AxoGraph Scientific) and Prism 6.

338 EPSCs were evoked by a 2-ms depolarization to 0 mV from a holding potential of –70 mV. PPRs were  
339 calculated as the ratio from the second and first EPSC amplitudes with an interstimulus interval of  
340 25 ms. The RRP size was calculated by integrating the transient current component of 5 s evoked by  
341 application of extracellular hypertonic 500 mM sucrose solution. Miniature EPSC (mEPSC) amplitude  
342 and frequency were detected using a template-based algorithm in Axograph X.

343

### 344 **Immunohistochemistry, time gated STED microscopy and cluster distance analysis.**

345 Immunohistochemistry was performed as described previously (Grauel et al., 2016). Conventional  
346 confocal tile scans of RIM-BP2 immunofluorescence in the hippocampus were acquired with a Leica  
347 SP8 laser confocal microscope equipped with a 20 $\times$  0.7-N.A. oil immersion objective.

348 Following immunostaining, sagittal cryosections (10  $\mu$ m) of RIM-BP2 WT and KO brains were imaged  
349 by gSTED with a Leica SP8 gSTED microscope (Leica Microsystems) as described previously (Grauel et  
350 al., 2016). Within each independent experiment, RIM-BP2 KO and WT samples were imaged with  
351 equal settings. Raw dual- and triple-channel gSTED images were deconvolved with Huygens  
352 Professional software (Scientific Volume Imaging) using a theoretical point spread function  
353 automatically computed based on pulsed- or continuous-wave STED optimized function and the  
354 specific microscope parameters. Default deconvolution settings were applied.

355 Experiments were repeated at least two times on different mice (biological replicates).

356 For cluster distance analysis, deconvolved images were threshold and segmented by watershed  
357 transform with Amira software (Visualization Sciences Group) to identify individual clusters and to  
358 obtain their x and y coordinates. Within the same independent experiment, the same threshold and  
359 segmentation parameters were used. According to the lateral resolution achieved, clusters with a  
360 size smaller than 0.0025  $\mu$ m<sup>2</sup> were not considered for analysis. To select MUNC13-1 and Ca<sub>v</sub>2.1  
361 clusters within the ZnT3+ area, a mask was created applying a threshold on deconvolved ZnT3+  
362 confocal images with Amira software (Visualization Sciences Group). The average number of clusters  
363 at specific distances and the k-nearest neighbor distance were analyzed with a MATLAB custom-  
364 written script, as previously described (Grauel et al., 2016).

365

### 366 **Electron Microscopy.**

367 Acute Hippocampal slices (150  $\mu$ m) were prepared as described above and frozen at RT using an  
368 HPM 100 (Leica) supported with extracellular solution containing 15% Ficoll.

369 Slices from at least 3 different WT and KO animals were frozen and processed in parallel (biological  
370 replicate). After freezing, samples were transferred into cryovials containing 1% glutaraldehyde, 2%  
371 osmium tetroxide, and 1% ddH<sub>2</sub>O in anhydrous acetone in an AFS2 (Leica) with the following  
372 temperature program: -90°C for 72 h, heating to -60°C in 20 h, -60°C for 8 h, heating to -30°C in 15 h,  
373 -30°C for 8 h, heating to -20°C in 8 h. After staining with 1% uranyl acetate, samples were infiltrated  
374 and embedded into Epon and backed 48 h at 60 °C. Serial 40-nm sections were cut using a  
375 microtome (Leica) and collected on formvar-coated single-slot grids (Science Services GmbH). Before  
376 imaging, sections were contrasted with 2.5% (wt/vol) uranyl acetate and lead citrate. Samples were  
377 imaged in a FEI Tecnai G20 TEM operating at 80-120 keV and images taken with a Veleta 2K x K CCD  
378 camera (Olympus) and analyzed with a custom-written ImageJ (NIH) and MATLAB (The MathWorks,  
379 Inc.) script.

380

#### 381 **Statistical Analysis.**

382 For electrophysiological experiments in brain slices, numbers of experiments are indicated in n/N,  
383 while n represents the number of brain slices and N the number of animals. Sample size estimation  
384 was done as published previously<sup>30</sup>.

385 For gSTED, statistical analysis was done with SPSS Statistics software (IBM). Normality was assessed  
386 checking histograms and Q-Q plots. Pairwise comparisons were analyzed with the Mann–Whitney *U*  
387 test. Significance threshold  $\alpha$  was set to 0.05. Only p values less than 0.05 were considered  
388 significant. Values corresponding to one WT animal measured displaying an extreme outlier were  
389 excluded from the whole MF-CA3 MUNC13-1/Ca<sub>v</sub>2.1 data analysis, based on SPSS estimation of  
390 extreme values (value > Q3 + 3\*IQR). Values are expressed as mean ± SEM, and *n* indicates the  
391 number of animal tested. Sample size estimation was done as published previously<sup>11</sup>.

392 For autaptic electrophysiological experiments, statistical analysis was done in Prism (Graphpad).  
393 First, the D'Agostino-Pearson test was applied to check whether data are normally distributed. If data  
394 were normally distributed, statistical significance was determined by using one-way ANOVA followed  
395 by Turkey *post hoc* test. For data which were not normally distributed, statistical significance was  
396 assessed using non-parametric Kruskal-Wallis test with Dunn's *post hoc* test. Values are expressed as  
397 mean ± SEM, and *n* indicates the number of recorded autapses. Sample size estimation was done as  
398 published previously<sup>19,37</sup>.

399 For electron microscopy experiments, the D'Agostino–Pearson omnibus test was used to check for  
400 normal distribution of data. The For WT vs. KO comparison, an unpaired *t* test with Welch's  
401 correction was used for normally distributed data and the Mann–Whitney *U* test was used for not  
402 normally distributed data. Values are expressed as mean ± SEM, and *n* indicates the number of active  
403 zones analyzed. Sample size estimation was done as published previously<sup>11</sup>.

#### 404 **Acknowledgement**

405 This work was supported by the Deutsche Forschungsgemeinschaft (Collaborative Research  
406 Grant SFB 958 [to D.S. (A5), S.S. (A3, A6), C.R. (A5)] and Excellence Cluster NeuroCure Exc257  
407 (to D.S., S.S., and C.R.). We thank Melissa Herman and Gülcin Vardar for providing critical  
408 advice for writing the manuscript and Alexander Walter for providing the gSTED analysis  
409 script and comments. We thank Berit Söhl-Kielczynski, Anke Schönherr, Susanne  
410 Rieckmann und Lisa Züchner for technical support; and Jörg Breustedt for discussions. We  
411 thank the Charité viral core facility for virus production and the cellular imaging facility of  
412 the Leibniz-Forschungsinstitut für Molekulare Pharmakologie (FMP) for the use of the gSTED  
413 microscope. We thank Anna Fejtova and Eckart Gundelfinger for the RIM-BP2 antibody. We  
414 thank Martin Lehmann (FMP Berlin, Cellular Imaging Facility) for the use of the Leica  
415 gSTED microscope.

416

417

418 **Author Contributions**

419

420 M.M.B. designed and performed EM experiments and granule cell recordings

421 M.M. designed and performed gSTED experiments

422 C.W. designed and performed slice experiments

423 M.M.B., C.R., M.M., S.S. and D.S. wrote the manuscript

424 A.S., L.M.V. and P.B. assisted with slice recordings

425 B.B.A. and K.G. assisted with granule cell experiments

426 S.S., C.R. and D.S. designed experiments, supervised the project

## 427 References

- 428 1 Sudhof, T. C. The presynaptic active zone. *Neuron* **75**, 11-25,  
429 doi:10.1016/j.neuron.2012.06.012 (2012).
- 430 2 Atwood, H. L. & Karunanithi, S. Diversification of synaptic strength: presynaptic elements.  
431 *Nature reviews. Neuroscience* **3**, 497-516, doi:10.1038/nrn876 (2002).
- 432 3 O'Rourke, N. A., Weiler, N. C., Micheva, K. D. & Smith, S. J. Deep molecular diversity of  
433 mammalian synapses: why it matters and how to measure it. *Nature reviews. Neuroscience*  
434 **13**, 365-379, doi:10.1038/nrn3170 (2012).
- 435 4 Chabrol, F. P., Arenz, A., Wiechert, M. T., Margrie, T. W. & DiGregorio, D. A. Synaptic diversity  
436 enables temporal coding of coincident multisensory inputs in single neurons. *Nature*  
437 *neuroscience* **18**, 718-727, doi:10.1038/nn.3974 (2015).
- 438 5 Rosenmund, C. *et al.* Differential control of vesicle priming and short-term plasticity by  
439 Munc13 isoforms. *Neuron* **33**, 411-424 (2002).
- 440 6 Weston, M. C., Nehring, R. B., Wojcik, S. M. & Rosenmund, C. Interplay between VGLUT  
441 isoforms and endophilin A1 regulates neurotransmitter release and short-term plasticity.  
442 *Neuron* **69**, 1147-1159, doi:10.1016/j.neuron.2011.02.002 (2011).
- 443 7 Hu, Z., Tong, X. J. & Kaplan, J. M. UNC-13L, UNC-13S, and Tomosyn form a protein code for  
444 fast and slow neurotransmitter release in *Caenorhabditis elegans*. *eLife* **2**, e00967,  
445 doi:10.7554/eLife.00967 (2013).
- 446 8 Bohme, M. A. *et al.* Active zone scaffolds differentially accumulate Unc13 isoforms to tune  
447 Ca<sup>2+</sup> channel-vesicle coupling. *Nature neuroscience* **19**, 1311-1320, doi:10.1038/nn.4364  
448 (2016).
- 449 9 Liu, K. S. *et al.* RIM-binding protein, a central part of the active zone, is essential for  
450 neurotransmitter release. *Science* **334**, 1565-1569, doi:10.1126/science.1212991 (2011).
- 451 10 Acuna, C., Liu, X., Gonzalez, A. & Sudhof, T. C. RIM-BPs Mediate Tight Coupling of Action  
452 Potentials to Ca<sup>2+</sup>-Triggered Neurotransmitter Release. *Neuron* **87**, 1234-1247,  
453 doi:10.1016/j.neuron.2015.08.027 (2015).
- 454 11 Grauel, M. K. *et al.* RIM-binding protein 2 regulates release probability by fine-tuning calcium  
455 channel localization at murine hippocampal synapses. *Proceedings of the National Academy*  
456 *of Sciences of the United States of America* **113**, 11615-11620, doi:10.1073/pnas.1605256113  
457 (2016).
- 458 12 Luo, F., Liu, X., Sudhof, T. C. & Acuna, C. Efficient stimulus-secretion coupling at ribbon  
459 synapses requires RIM-binding protein tethering of L-type Ca<sup>2+</sup> channels. *Proceedings of*  
460 *the National Academy of Sciences of the United States of America* **114**, E8081-E8090,  
461 doi:10.1073/pnas.1702991114 (2017).
- 462 13 Ackermann, F., Waites, C. L. & Garner, C. C. Presynaptic active zones in invertebrates and  
463 vertebrates. *EMBO reports*, doi:10.15252/embr.201540434 (2015).
- 464 14 Nicoll, R. A. & Schmitz, D. Synaptic plasticity at hippocampal mossy fibre synapses. *Nature*  
465 *reviews. Neuroscience* **6**, 863-876, doi:10.1038/nrn1786 (2005).
- 466 15 Yoshino, M., Sawada, S., Yamamoto, C. & Kamiya, H. A metabotropic glutamate receptor  
467 agonist DCG-IV suppresses synaptic transmission at mossy fiber pathway of the guinea pig  
468 hippocampus. *Neuroscience letters* **207**, 70-72 (1996).
- 469 16 Imig, C. *et al.* The morphological and molecular nature of synaptic vesicle priming at  
470 presynaptic active zones. *Neuron* **84**, 416-431, doi:10.1016/j.neuron.2014.10.009 (2014).
- 471 17 Augustin, I., Rosenmund, C., Sudhof, T. C. & Brose, N. Munc13-1 is essential for fusion  
472 competence of glutamatergic synaptic vesicles. *Nature* **400**, 457-461, doi:10.1038/22768  
473 (1999).
- 474 18 Deng, L., Kaeser, P. S., Xu, W. & Sudhof, T. C. RIM proteins activate vesicle priming by  
475 reversing autoinhibitory homodimerization of Munc13. *Neuron* **69**, 317-331,  
476 doi:10.1016/j.neuron.2011.01.005 (2011).
- 477 19 Camacho, M. *et al.* Heterodimerization of Munc13 C2A domain with RIM regulates synaptic  
478 vesicle docking and priming. *Nature communications* **8**, 15293, doi:10.1038/ncomms15293  
479 (2017).

- 480 20 Wagh, D. A. *et al.* Bruchpilot, a protein with homology to ELKS/CAST, is required for  
481 structural integrity and function of synaptic active zones in *Drosophila*. *Neuron* **49**, 833-844,  
482 doi:10.1016/j.neuron.2006.02.008 (2006).
- 483 21 Schmitz, F., Königstorfer, A. & Südhof, T. C. RIBEYE, a component of synaptic ribbons: a  
484 protein's journey through evolution provides insight into synaptic ribbon function. *Neuron*  
485 **28**, 857-872 (2000).
- 486 22 Nusser, Z. Creating diverse synapses from the same molecules. *Current opinion in*  
487 *neurobiology* **51**, 8-15, doi:10.1016/j.conb.2018.01.001 (2018).
- 488 23 Varoqueaux, F. *et al.* Total arrest of spontaneous and evoked synaptic transmission but  
489 normal synaptogenesis in the absence of Munc13-mediated vesicle priming. *Proceedings of*  
490 *the National Academy of Sciences of the United States of America* **99**, 9037-9042,  
491 doi:10.1073/pnas.122623799 (2002).
- 492 24 Weimer, R. M. *et al.* UNC-13 and UNC-10/rim localize synaptic vesicles to specific membrane  
493 domains. *The Journal of neuroscience : the official journal of the Society for Neuroscience* **26**,  
494 8040-8047, doi:10.1523/JNEUROSCI.2350-06.2006 (2006).
- 495 25 Aravamudan, B., Fergestad, T., Davis, W. S., Rodesch, C. K. & Broadie, K. *Drosophila* UNC-13 is  
496 essential for synaptic transmission. *Nature neuroscience* **2**, 965-971, doi:10.1038/14764  
497 (1999).
- 498 26 Davydova, D. *et al.* Bassoon specifically controls presynaptic P/Q-type Ca<sup>2+</sup> channels via  
499 RIM-binding protein. *Neuron* **82**, 181-194, doi:10.1016/j.neuron.2014.02.012 (2014).
- 500 27 Vyleta, N. P. & Jonas, P. Loose coupling between Ca<sup>2+</sup> channels and release sensors at a  
501 plastic hippocampal synapse. *Science* **343**, 665-670, doi:10.1126/science.1244811 (2014).
- 502 28 Eggermann, E., Bucurenciu, I., Goswami, S. P. & Jonas, P. Nanodomain coupling between  
503 Ca<sup>2+</sup> channels and sensors of exocytosis at fast mammalian synapses. *Nature reviews.*  
504 *Neuroscience* **13**, 7-21, doi:10.1038/nrn3125 (2012).
- 505 29 Andrews-Zwilling, Y. S., Kawabe, H., Reim, K., Varoqueaux, F. & Brose, N. Binding to Rab3A-  
506 interacting molecule RIM regulates the presynaptic recruitment of Munc13-1 and  
507 ubMunc13-2. *The Journal of biological chemistry* **281**, 19720-19731,  
508 doi:10.1074/jbc.M601421200 (2006).
- 509 30 Breustedt, J. *et al.* Munc13-2 differentially affects hippocampal synaptic transmission and  
510 plasticity. *Cereb Cortex* **20**, 1109-1120, doi:10.1093/cercor/bhp170 (2010).
- 511 31 Betz, A. *et al.* Functional interaction of the active zone proteins Munc13-1 and RIM1 in  
512 synaptic vesicle priming. *Neuron* **30**, 183-196 (2001).
- 513 32 Schoch, S. *et al.* RIM1alpha forms a protein scaffold for regulating neurotransmitter release  
514 at the active zone. *Nature* **415**, 321-326, doi:10.1038/415321a (2002).
- 515 33 Cembrowski, M. S., Wang, L., Sugino, K., Shields, B. C. & Spruston, N. Hipposeq: a  
516 comprehensive RNA-seq database of gene expression in hippocampal principal neurons. *eLife*  
517 **5**, e14997, doi:10.7554/eLife.14997 (2016).
- 518 34 Rost, B. R. *et al.* Autaptic cultures of single hippocampal granule cells of mice and rats. *The*  
519 *European journal of neuroscience* **32**, 939-947, doi:10.1111/j.1460-9568.2010.07387.x  
520 (2010).
- 521 35 Arancillo, M. *et al.* Titration of Syntaxin1 in mammalian synapses reveals multiple roles in  
522 vesicle docking, priming, and release probability. *The Journal of neuroscience : the official*  
523 *journal of the Society for Neuroscience* **33**, 16698-16714, doi:10.1523/JNEUROSCI.0187-  
524 13.2013 (2013).
- 525 36 Lois, C., Hong, E. J., Pease, S., Brown, E. J. & Baltimore, D. Germline transmission and tissue-  
526 specific expression of transgenes delivered by lentiviral vectors. *Science* **295**, 868-872,  
527 doi:10.1126/science.1067081 (2002).
- 528 37 Liu, X. *et al.* Functional synergy between the Munc13 C-terminal C1 and C2 domains. *eLife* **5**,  
529 doi:10.7554/eLife.13696 (2016).
- 530  
531

## Figure 1

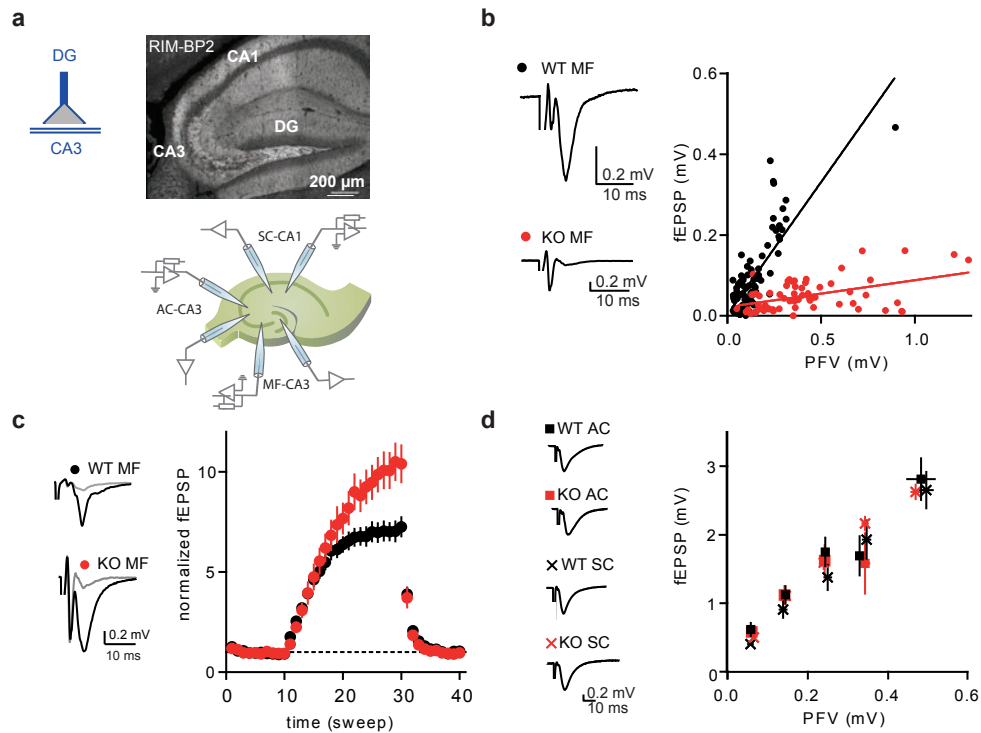

**Figure 1: RIM-BP2 KO impacts synaptic transmission specifically at MF synapses.**

(a) Immunostaining of RIM-BP2 in hippocampal brain slices (DG = dentate gyrus) and schematic illustration of recording configurations. (b) Input-output of synaptic transmission of MF synapses, plotted as PFV against fEPSP amplitude. Sample traces show averages of 10 sweeps. (c) Frequency facilitation with 1 Hz stimulation of MF synapses (sweep 10 - 30). Sample traces show averages of five sweeps before (grey) and at the end of 1 Hz stimulation (black). (d) Input-output of synaptic transmission, plotted as PFV against fEPSP amplitude, of associative commissural (AC) and Schaffer collateral (SC) synapses showed no difference between RIM-BP2 WT and KO slices. Sample traces show averages of 10 sweeps. Values represent mean  $\pm$  SEM.

## Figure 2

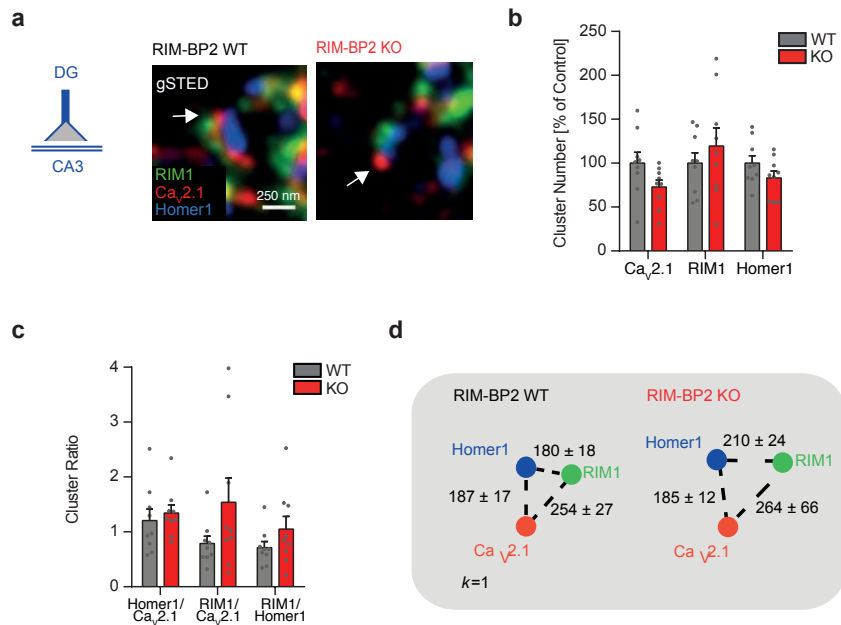

**Figure 2: RIM-BP2 deletion does not alter the localization of Ca<sub>v</sub>2.1 clusters relative to the active zone protein RIM1 and the postsynaptic marker Homer1.**

(a) gSTED images of Ca<sub>v</sub>2.1, RIM1 and Homer1 clusters at MF boutons (MFBs) of RIM-BP2 WT and KO brain slices. (b) Cluster number of Ca<sub>v</sub>2.1, RIM1 and Homer1 at MFBs of RIM-BP2 WT and KO mice, normalized to WT mice. (c) Cluster ratios and distances of the first closest  $k$  neighbor ( $k=1$ , d), no significant differences were observed between RIM-BP2 WT and KO mice. Values represent mean  $\pm$  SEM.



## Figure 3

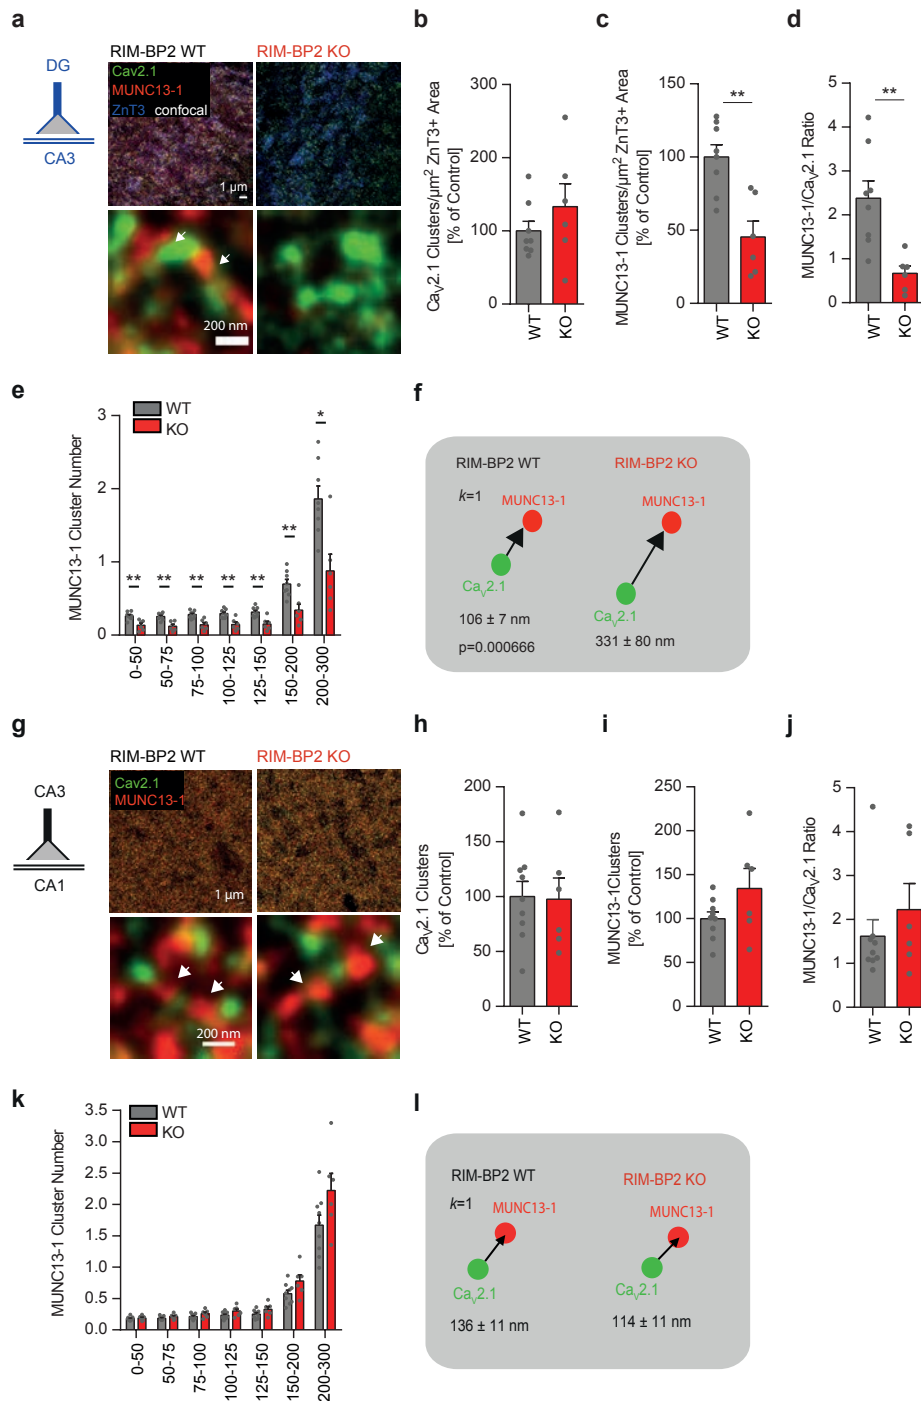

**Figure 3: Loss of RIM-BP2 specifically reduces MUNC13-1 levels at MF synapses but not at CA3-CA1 synapses.**

(a) Representative gSTED images of  $Ca_v2.1$  and Munc13-1 clusters at MF boutons (MFB) identified by ZnT3 expression (confocal) in RIM-BP2 WT and KO brain sections. Arrows indicate Munc13-1 clusters nearby  $Ca_v2.1$  clusters. (b) Number of  $Ca_v2.1$  clusters per  $\mu m^2$  of ZnT3+ area in RIM-BP2 KO and WT mice, normalized to RIM-BP2 WT. (c) Number of Munc13-1 clusters per  $\mu m^2$  of ZnT3+ area normalized to RIM-BP2 WT mice. (d) Ratio of MUNC13-1 clusters/ $Ca_v2.1$  clusters in RIM-BP2 KO and WT mice. (e) The number of Munc13-1 clusters at determined distance intervals (nm) from a given  $Ca_v2.1$  cluster decreased significantly at all distances analyzed in RIM-BP2 KO, while the distance of the first closest  $k$  neighbor ( $k=1$ ; f) significantly increased. (g) Representative gSTED images of  $Ca_v2.1$

and Munc13-1 clusters at CA3-CA1 synapses in RIM-BP2 WT and KO brain sections. Arrows indicate Munc13-1 clusters nearby  $Ca_v2.1$  clusters. **(h)** Number of  $Ca_v2.1$  clusters and MUNC13-1 clusters **(i)** found at CA3-CA1 synapses in RIM-BP2 KO and WT mice, normalized to RIM-BP2 WT mice. **(j)** Ratio of MUNC13-1 clusters/ $Ca_v2.1$  clusters at CA3-CA1 synapses. **(k)** At CA3-CA1 synapses, loss of RIM-BP2 does not significantly alter either the number of Munc13-1 clusters at determined distance intervals (nm) from a given  $Ca_v2.1$  cluster or the distance at which the first closest  $k$  neighbor ( $k=1$ , **l**) is found. Values represent mean  $\pm$  SEM. \* $p < 0.05$ , \*\* $p < 0.01$ .

## Figure 4

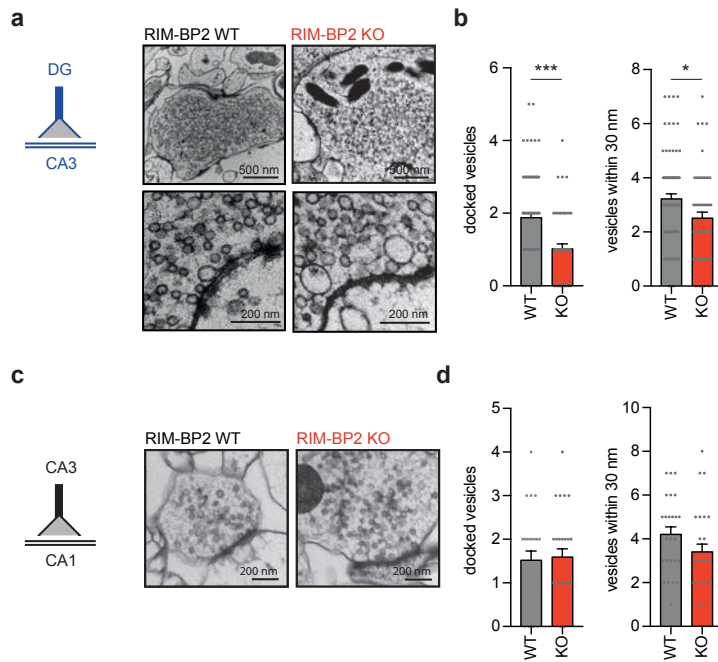

### Figure 4: Loss of RIM-BP2 specifically impacts vesicle docking at MF synapses.

(a) Representative EM images of MF synapses from acute hippocampal slices obtained from RIM-BP2 KO and WT mice. (b) Summary graphs show a reduction of docked vesicles and vesicles within 30 nm of the active zone at RIM-BP2 KO MF synapse compared to WT MF synapses. (c) Representative EM images of CA3-CA1 synapses of acute hippocampal slices from RIM-BP2 KO and WT mice. (d) Summary graph of docked vesicles and vesicles within 30 nm of the active zone show no difference for RIM-BP2 KO and WT synapses. Values represent mean  $\pm$  SEM. \* $p < 0.05$ , \*\* $p < 0.01$ .

## Figure 5

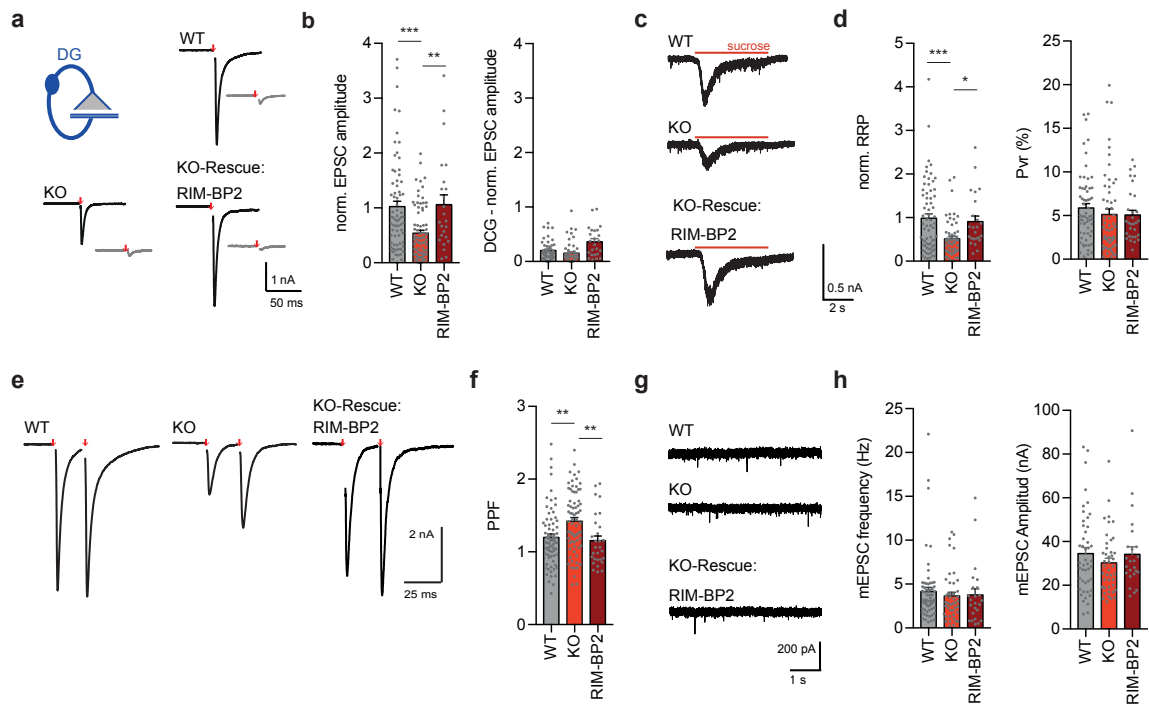

### Figure 5: RIM-BP2 KO impacts synaptic transmission at granule autaptic neurons.

(a) Sample traces of evoked EPSC amplitudes before (black) and after DCG IV application (grey) for RIM-BP2 WT and KO neurons. RIM-BP2 KO neurons were rescued by lentiviral transduction of RIM-BP2. (b) Summary graphs of normalized EPSC amplitudes evoked by 2 ms depolarization (red arrow). (c) Sample traces and (d) summary graphs of normalized RRP responses elicited by a 5 s application of 500 mM sucrose. Summary graph of the  $P_{VR}$  calculated as the ratio of the EPSC charge and the RRP charge. (e) Sample traces of evoked EPSC amplitudes with an interstimulus interval of 25 ms. (f) Summary graph of paired-pulse ratio (PPR) of RIM-BP2 WT, KO and RIM-BP2 rescued autaptic granule neurons. (g) Sample traces of miniature EPSCs (mEPSCs) and (h) summary graph of mEPSC amplitudes and frequencies. Values represent mean  $\pm$  SEM. \* $p < 0.05$ , \*\* $p < 0.01$ , \*\*\* $p < 0.001$ .

## Figure 6

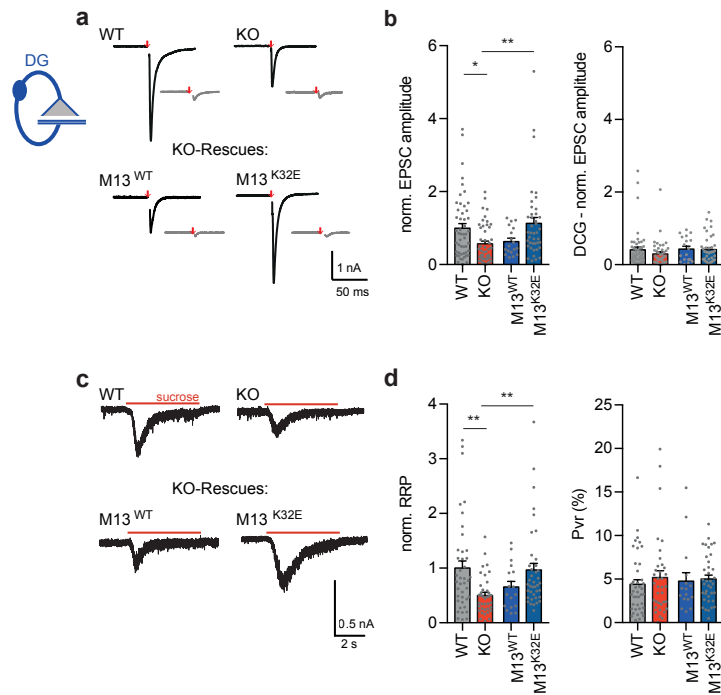

### Figure 6: Monomeric Munc13-1 rescues vesicle priming in RIM-BP2 KO granule autaptic neurons.

(a) Sample traces of evoked EPSC amplitudes before (black) and after DCG IV application (grey) for RIM-BP2 WT and KO neurons and lentiviral-transduced RIM-BP2 KO rescues with either Munc13-1 WT (M13<sup>WT</sup>) or Munc13-1 K32E (M13<sup>K32E</sup>). (b) Summary graphs of normalized EPSC amplitudes evoked by 2 ms depolarization (red arrow). (c) Sample traces and (d) summary graphs of normalized RRP responses elicited by a 5 s application of 500 mM sucrose. Summary graph of the P<sub>VR</sub> calculated as the ratio of the EPSC charge and the RRP charge. Values represent mean ± SEM. \*p < 0.05, \*\*p < 0.01.

## Supp. Figure 1

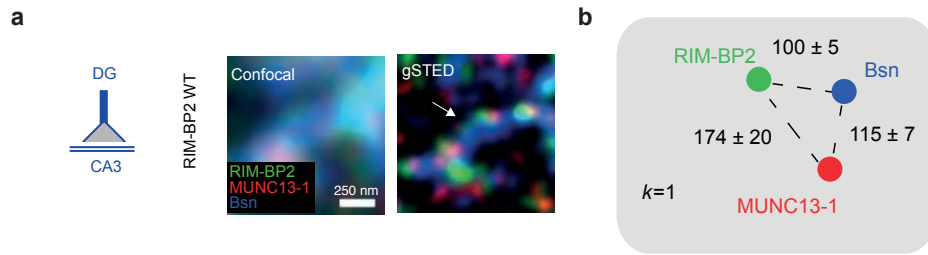

**Figure S1: RIM-BP2 localization relative to MUNC13-1 and Bassoon at MF synapses.**

(a) Confocal (left) and gSTED (right) images of RIM-BP2, Munc13-1 and Bassoon (Bsn) at the active zone of WT MFs *in situ*. (b) Distances at which the first closest  $k$  neighbor was found (nm). Values are mean  $\pm$  SEM.

## Supp. Figure 2

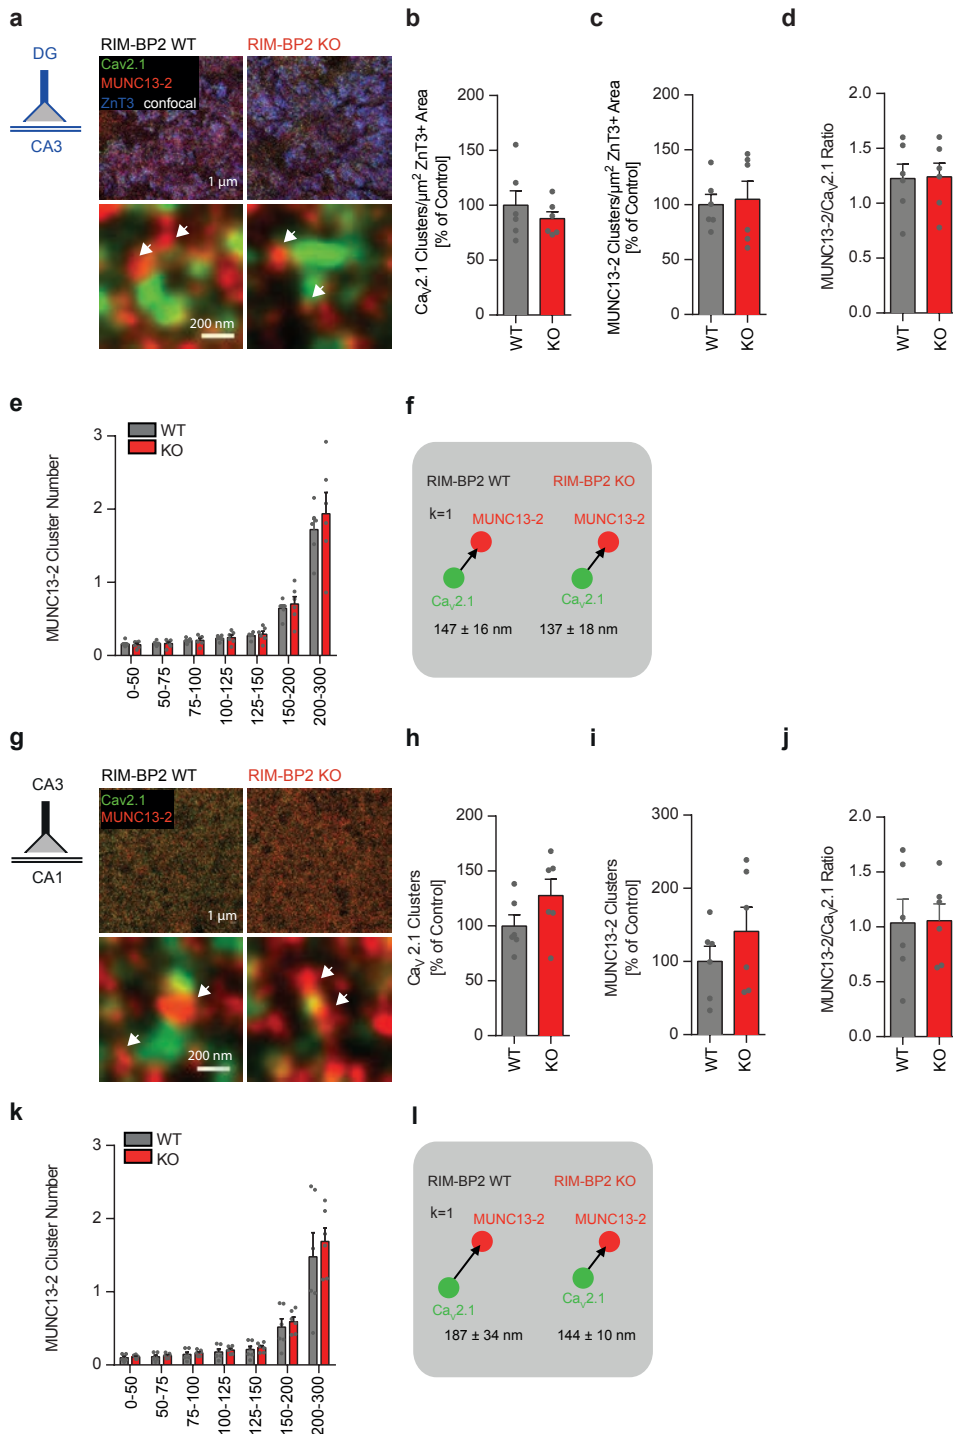

**Figure S2: Loss of RIM-BP2 does not alter MUNC13-2 levels at both MF-CA3 and CA3-CA1 synapses.** (a) Representative gSTED images of Ca<sub>v</sub>2.1 and Munc13-2 clusters at MF boutons (MFB) identified by ZnT3 expression (confocal) in RIM-BP2 WT and KO brain sections. Arrows indicate Munc13-2 clusters nearby Ca<sub>v</sub>2.1 clusters. (b) Number of Ca<sub>v</sub>2.1 clusters per  $\mu$ m<sup>2</sup> of ZnT3+ area in RIM-BP2 KO and WT mice, normalized to RIM-BP2 WT mice. (c) Number of Munc13-2 clusters per  $\mu$ m<sup>2</sup> of ZnT3+ area normalized to RIM-BP2 WT mice and ratio of MUNC13-2 clusters/Ca<sub>v</sub>2.1 clusters (d) in RIM-BP2 KO and WT mice. (e) Number of Munc13-2 clusters at determined distance intervals (nm) from a given Ca<sub>v</sub>2.1 cluster and distance at which the first closest *k* neighbor (*k*=1; f) is found. (g) Representative gSTED images of Ca<sub>v</sub>2.1 and Munc13-2 clusters at CA3-CA1 synapses in RIM-BP2 WT and KO brain

sections. Arrows indicate Munc13-2 clusters nearby  $Ca_v2.1$  clusters. **(h)** Number of  $Ca_v2.1$  clusters and MUNC13-2 clusters **(i)** found at CA3-CA1 synapses in RIM-BP2 KO and WT mice, normalized to RIM-BP2 WT mice. **(j)** Ratio of MUNC13-2 clusters/ $Ca_v2.1$  clusters at CA3-CA1 synapses. **(k)** At CA3-CA1 synapses, loss of RIM-BP2 does not significantly alter either the number of Munc13-1 clusters at determined distance intervals (nm) from a given  $Ca_v2.1$  cluster or the distance at which the first closest  $k$  neighbor ( $k=1$ ) is found.



## Supp. Figure 3

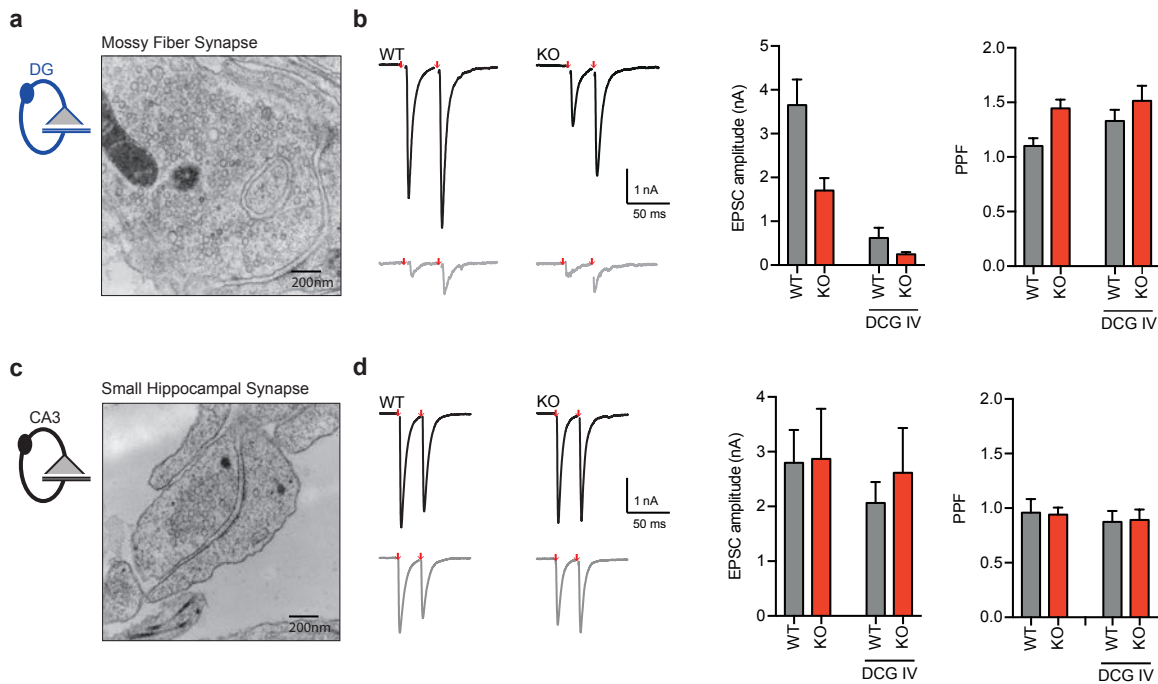

### Figure S3: Characterization of autaptic granule cells.

(a) Representative EM image of a granule cells in culture. (b) Sample traces and summary graphs of evoked EPSCs of granule cells with an interstimulus interval of 25 ms before (black) and after DCG IV application (grey) of RIM-BP2 WT and KO neurons. Both WT and KO neurons respond to the DCG IV application. EPSC amplitudes were reduced in RIM-BP2 KO neurons. (c) Representative EM image of a small central synapse in culture. (d) Sample traces and summary graphs of evoked EPSCs of hippocampal autaptic neurons with an interstimulus interval of 25 ms from RIM-BP2 WT and KO neurons that did not respond to DCG IV application. Autaptic neurons that do not respond to DCG IV application showed no reduction in EPSC amplitude in RIM-BP2 KO autapses compared to WT.

## Supp. Figure 4

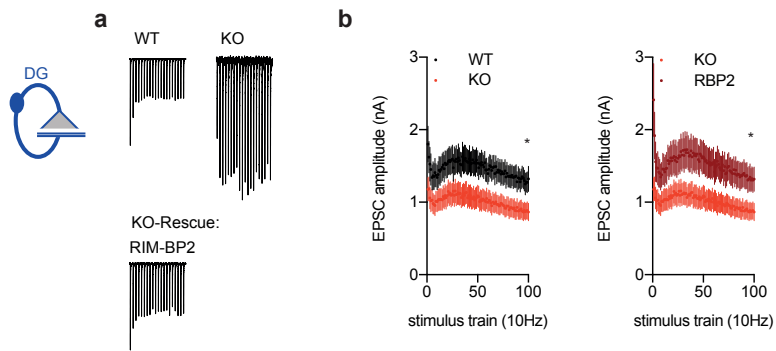

**Figure S4: Loss of RIM-BP2 increases synaptic facilitation in autaptic granule neurons.**

(a) Sample traces and (b) summary graph of EPSCs elicited by a 10 Hz stimulation train normalized to the first EPSC. Values represent mean  $\pm$  SEM. \* $p < 0.05$

**Table S1**

**Primary and secondary antibodies for immunohistochemistry**

| Antigen                      | Species | Dilution                                   | Source                                                                                                   |
|------------------------------|---------|--------------------------------------------|----------------------------------------------------------------------------------------------------------|
| Bsn<br>(N-terminal)          | ms      | 1:1200 (IHC)                               | Abcam                                                                                                    |
| Cav2.1<br>(rat aa1921-2212)  | Rb      | 1:500 (IHC)                                | Synaptic System                                                                                          |
| Cav2.1<br>(rat aa1921-2212)  | GP      | 1:500                                      | Synaptic System                                                                                          |
| Homer1<br>(human aa 1-186)   | GP      | 1:200 (IHC)                                | Synaptic System                                                                                          |
| MUNC13-1<br>(rat aa 3-317)   | Rb      | 1:150 (IHC)                                | Synaptic System                                                                                          |
| MUNC13-2<br>(rat aa 151-317) | Rb      | 1:150 (IHC)                                | Synaptic System                                                                                          |
| RIM1<br>(rat aa 602-723)     | ms      | 1:200 (IHC)                                | BD Pharmigen                                                                                             |
| RIM-BP2 (rat aa 589-869)     | GP      | 1:600/1:1000 (IHC)                         | Kind gift of A. Fejtova and Eckart Gundelfinger (Leibniz Institute for Neurobiology, Magdeburg, Germany) |
| ZnT3<br>(mouse aa 2-75)      | ms      | 1:500                                      | Synaptic System                                                                                          |
| Anti mouse AF488             | goat    | 1:100/1:200<br>(gSTED)<br>1:400 (confocal) | Invitrogen                                                                                               |
| Anti guinea pig AF594        | goat    | 1:100/1:200<br>(gSTED)<br>1:400 (confocal) | Invitrogen                                                                                               |
| Anti rabbit ATTO647N         | goat    | 1:100 (gSTED)                              | Active Motif                                                                                             |

**Table S2: Summary of Statistical analysis**

| Figure | Parameter                                                   | Distance [nm]/k neighbor | RIM-BP2 WT |         |      | RIM-BP2 KO |         |      | Statistic |                     |
|--------|-------------------------------------------------------------|--------------------------|------------|---------|------|------------|---------|------|-----------|---------------------|
|        |                                                             |                          | mean       | SEM     | n    | mean       | SEM     | n    | p         | test                |
| 1b     | Input-Output MF                                             | -                        | 0.6564     | 0.05528 | 7/22 | 0.06629    | 0.01568 | 7/18 | <0.001    | Linear regression   |
| 1c     | Input-Output AC                                             | -                        | 4.791      | 0.6983  | 6/17 | 4.405      | 0.8846  | 5/21 | 0.7312    | Linear regression   |
| 1c     | Input-Output SC                                             | -                        | 5.062      | 0.5386  | 3/9  | 5.162      | 0.2607  | 3/12 | 0.8534    | Linear regression   |
| 2b     | mfb Ca <sub>v</sub> 2.1 cluster number [% of Control]       | -                        | 100        | 12.25   | 9    | 73.01      | 7.63    | 9    | 0.050309  | Mann Whitney U test |
| 2b     | mfb RIM1 cluster number [% of Control]                      | -                        | 100        | 11.70   | 9    | 119.72     | 20.49   | 9    | 0.545701  | Mann Whitney U test |
| 2b     | mfb Homer1 cluster number [% of Control]                    | -                        | 100        | 8.59    | 9    | 83.33      | 7.69    | 9    | 0.258083  | Mann Whitney U test |
| 2c     | mfb RIM1/Ca <sub>v</sub> 2.1 ratio                          | -                        | 0.79       | 0.14    | 9    | 1.54       | 0.44    | 9    | 0.135911  | Mann Whitney U test |
| 2c     | mfb RIM1/Homer1 ratio                                       | -                        | 0.71       | 0.11    | 9    | 1.05       | 0.23    | 9    | 0.258083  | Mann Whitney U test |
| 2c     | mfb Homer1/ Ca <sub>v</sub> 2.1 ratio                       | -                        | 1.21       | 0.21    | 9    | 1.34       | 0.15    | 9    | 0.545701  | Mann Whitney U test |
| 2d     | mfb Mean <i>k</i> distance (RIM1- Ca <sub>v</sub> 2.1) [nm] | <i>k</i> =1              | 254        | 27      | 9    | 264        | 66      | 9    | 0.386508  | Mann Whitney U test |
| 2d     | mfb Mean <i>k</i> distance (Homer1-RIM1) [nm]               | <i>k</i> =1              | 180        | 18      | 9    | 210        | 24      | 9    | 0.436281  | Mann Whitney U test |

|           |                                                                                |             |       |       |   |        |       |   |                    |                     |
|-----------|--------------------------------------------------------------------------------|-------------|-------|-------|---|--------|-------|---|--------------------|---------------------|
| 2d        | mfb Mean <i>k</i> distance (Homer1- Cav2.1 ) [nm]                              | <i>k</i> =1 | 187   | 17    | 9 | 185    | 12    | 9 | <i>p</i> >0.999    | Mann Whitney U test |
| 3b        | mfb Cav2.1 cluster number/ $\mu\text{m}^2\text{ZnT3+}$ area [% of Control]*    | --          | 100   | 13.27 | 8 | 133.17 | 31.39 | 6 | <i>p</i> =0.228438 | Mann Whitney U test |
| 3c        | mfb MUNC13-1 cluster number/ $\mu\text{m}^2\text{ZnT3+}$ area [% of Control]*  | -           | 100   | 8.44  | 8 | 45.38  | 10.84 | 6 | <i>p</i> =0.007992 | Mann Whitney U test |
| 3d        | mfb MUNC13-1/Cav2.1 ratio*                                                     | -           | 2.38  | 0.40  | 8 | 0.67   | 0.17  | 6 | <i>p</i> =0.001332 | Mann Whitney U test |
| not shown | ZnT3+ area [% of Control]*                                                     | -           | 100   | 12.54 | 8 | 76.19  | 18.18 | 6 | <i>p</i> =0.081252 | Mann Whitney U test |
| 3e        | mfb Mean MUNC13-1 cluster number at tested distance to a given Cav2.1 cluster* | 0-50        | 0.263 | 0.019 | 8 | 0.135  | 0.028 | 6 | <i>p</i> =0.004662 | Mann Whitney U test |
|           |                                                                                | 50-75       | 0.254 | 0.016 | 8 | 0.122  | 0.026 | 6 | <i>p</i> =0.002664 |                     |
|           |                                                                                | 75-100      | 0.280 | 0.018 | 8 | 0.142  | 0.030 | 6 | <i>p</i> =0.002664 |                     |
|           |                                                                                | 100-125     | 0.295 | 0.021 | 8 | 0.146  | 0.032 | 6 | <i>p</i> =0.004662 |                     |
|           |                                                                                | 125-150     | 0.315 | 0.024 | 8 | 0.153  | 0.035 | 6 | <i>p</i> =0.007992 |                     |
|           |                                                                                | 150-200     | 0.698 | 0.062 | 8 | 0.343  | 0.080 | 6 | <i>p</i> =0.007992 |                     |
|           |                                                                                | 200-300     | 1.862 | 0.178 | 8 | 0.878  | 0.226 | 6 | <i>p</i> =0.012654 |                     |
| 3f        | mfb Mean <i>k</i> distance (MUNC13-1- Cav2.1) [nm]*                            | <i>k</i> =1 | 106   | 7     | 8 | 331    | 80    | 6 | <i>p</i> =0.000666 | Mann Whitney U test |
| 3h        | CA1 Cav2.1 cluster number [% of Control]*                                      | -           | 100   | 13.96 | 9 | 97.56  | 19.46 | 6 | 0.775624           | Mann Whitney U test |
| 3i        | CA1 MUNC13-1 cluster number [% of Control]*                                    | -           | 100   | 7.68  | 9 | 134.22 | 22.74 | 6 | 0.272128           | Mann Whitney U test |
| 3j        | CA1 MUNC13-1/ Cav2.1 ratio*                                                    | -           | 1.62  | 0.38  | 9 | 2.23   | 0.59  | 6 | 0.528671           | Mann Whitney U test |
| 3k        | CA1 Mean MUNC13-1 cluster number at tested distance to a given Cav2.1 cluster* | 0-50        | 0.180 | 0.010 | 9 | 0.188  | 0.016 | 6 | 0.688911           | Mann Whitney U test |
|           |                                                                                | 50-75       | 0.186 | 0.011 | 9 | 0.211  | 0.018 | 6 | 0.272128           |                     |
|           |                                                                                | 75-100      | 0.213 | 0.015 | 9 | 0.259  | 0.026 | 6 | 0.144655           |                     |

|           |                                                                                             |             |       |        |    |        |        |    |          |                     |
|-----------|---------------------------------------------------------------------------------------------|-------------|-------|--------|----|--------|--------|----|----------|---------------------|
|           |                                                                                             | 100-125     | 0.233 | 0.018  | 9  | 0.300  | 0.034  | 6  | 0.144655 |                     |
|           |                                                                                             | 125-150     | 0.251 | 0.022  | 9  | 0.330  | 0.040  | 6  | 0.113487 |                     |
|           |                                                                                             | 150-200     | 0.577 | 0.054  | 9  | 0.781  | 0.097  | 6  | 0.144655 |                     |
|           |                                                                                             | 200-300     | 1.669 | 0.160  | 9  | 2.223  | 0.270  | 6  | 0.144655 |                     |
| 3l        | CA1 Mean <i>k</i> distance (MUNC13-1- Ca <sub>v</sub> 2.1 ) [nm]*                           | <i>k</i> =1 | 136   | 11     | 9  | 114    | 11     | 6  | 0.181019 | Mann Whitney U test |
| 4b        | docked vesicles MF                                                                          | -           | 1.899 | 0.1402 | 79 | 1.019  | 0.1387 | 53 | <0.0001  | Mann Whitney U test |
| 4b        | Vesicles within 30nm MF                                                                     | -           | 3.304 | 0.2065 | 79 | 2.509  | 0.228  | 53 | 0.0103   | Mann Whitney U test |
| 4d        | Docked vesicles CA1                                                                         | -           | 1.52  | 0.2091 | 25 | 1.593  | 0.1869 | 27 | 0.8483   | Mann Whitney U test |
| 4d        | Vesicles within 30nm CA1                                                                    | -           | 4.2   | 0.3512 | 25 | 3.407  | 0.3551 | 27 | 0.1195   | Mann Whitney U test |
| S2b       | mfb Ca <sub>v</sub> 2.1 cluster number/μm <sup>2</sup> ZnT3+ area [% of Control]#           | -           | 100   | 13.22  | 6  | 87.79  | 6.40   | 6  | 0.588745 | Mann Whitney U test |
| S2c       | mfb MUNC13-2 cluster number/μm <sup>2</sup> ZnT3+ area [% of Control]#                      | -           | 100   | 9.35   | 6  | 105.09 | 16.35  | 6  | p>0.999  | Mann Whitney U test |
| S2d       | mfb MUNC13-2/Ca <sub>v</sub> 2.1 ratio#                                                     | -           | 1.22  | 0.13   | 6  | 1.24   | 0.13   | 6  | 0.937229 | Mann Whitney U test |
| not shown | ZnT3+ area [% of Control]#                                                                  | -           | 100   | 18.66  | 6  | 137.13 | 13.12  | 6  | 0.393939 | Mann Whitney U test |
| S2e       | mfb Mean MUNC13-2 cluster number at tested distance to a given Ca <sub>v</sub> 2.1 cluster# | 0-50        | 0.159 | 0.016  | 6  | 0.149  | 0.019  | 6  | 0.937229 | Mann Whitney U test |
|           |                                                                                             | 50-75       | 0.164 | 0.012  | 6  | 0.163  | 0.022  | 6  | 0.937229 | Mann Whitney U test |
|           |                                                                                             | 75-100      | 0.206 | 0.013  | 6  | 0.207  | 0.028  | 6  | 0.937229 | Mann Whitney U test |

|            |                                                                                                  |         |       |       |   |        |       |   |          |                           |
|------------|--------------------------------------------------------------------------------------------------|---------|-------|-------|---|--------|-------|---|----------|---------------------------|
|            |                                                                                                  | 100-125 | 0.237 | 0.015 | 6 | 0.247  | 0.034 | 6 | 0.699134 | Mann<br>Whitney<br>U test |
|            |                                                                                                  | 125-150 | 0.272 | 0.017 | 6 | 0.291  | 0.041 | 6 | 0.937229 | Mann<br>Whitney<br>U test |
|            |                                                                                                  | 150-200 | 0.644 | 0.047 | 6 | 0.704  | 0.100 | 6 | 0.818182 | Mann<br>Whitney<br>U test |
|            |                                                                                                  | 200-300 | 1.721 | 0.145 | 6 | 1.940  | 0.290 | 6 | 0.588745 | Mann<br>Whitney<br>U test |
| <b>S2f</b> | <b>mfb Mean k distance (MUNC13-2- Ca<sub>v</sub>2.1) [nm]#</b>                                   | k=1     | 147   | 16    | 6 | 137    | 18    | 6 | 0.393939 | Mann<br>Whitney<br>U test |
| <b>S2h</b> | <b>CA1 Ca<sub>v</sub>2.1 cluster number [% of Control]#</b>                                      | -       | 100   | 10.01 | 6 | 127.72 | 14.74 | 6 | 0.240260 | Mann<br>Whitney<br>U test |
| <b>S2i</b> | <b>CA1 MUNC13-2 cluster number [% of Control]#</b>                                               | -       | 100   | 20.72 | 6 | 141.04 | 33.17 | 6 | 0.393939 | Mann<br>Whitney<br>U test |
| <b>S2j</b> | <b>CA1 MUNC13-2/ Ca<sub>v</sub>2.1 ratio#</b>                                                    | -       | 1.04  | 0.21  | 6 | 1.06   | 0.15  | 6 | p>0.999  | Mann<br>Whitney<br>U test |
| <b>S2k</b> | <b>CA1 Mean MUNC13-2 cluster number at tested distance to a given Ca<sub>v</sub>2.1 cluster#</b> | 0-50    | 0.099 | 0.019 | 6 | 0.112  | 0.010 | 6 | 0.588745 | Mann<br>Whitney<br>U test |
|            |                                                                                                  | 50-75   | 0.112 | 0.022 | 6 | 0.129  | 0.013 | 6 | 0.588745 | Mann<br>Whitney<br>U test |
|            |                                                                                                  | 75-100  | 0.146 | 0.031 | 6 | 0.166  | 0.017 | 6 | 0.588745 | Mann<br>Whitney<br>U test |
|            |                                                                                                  | 100-125 | 0.180 | 0.038 | 6 | 0.205  | 0.021 | 6 | 0.588745 | Mann<br>Whitney<br>U test |
|            |                                                                                                  | 125-150 | 0.210 | 0.046 | 6 | 0.238  | 0.025 | 6 | 0.588745 | Mann<br>Whitney<br>U test |
|            |                                                                                                  | 150-200 | 0.517 | 0.115 | 6 | 0.592  | 0.064 | 6 | 0.588745 | Mann<br>Whitney<br>U test |
|            |                                                                                                  | 200-300 | 1.477 | 0.333 | 6 | 1.688  | 0.185 | 6 | 0.588745 | Mann<br>Whitney           |

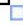

|     |                                                     |             |     |    |   |     |    |   |          |                                     |
|-----|-----------------------------------------------------|-------------|-----|----|---|-----|----|---|----------|-------------------------------------|
| S2l | CA1 Mean <i>k</i> distance (MUNC13-2- Cav2.1) [nm]# | <i>k</i> =1 | 187 | 34 | 6 | 144 | 10 | 6 | 0.588745 | U test<br>Mann<br>Whitney<br>U test |
|-----|-----------------------------------------------------|-------------|-----|----|---|-----|----|---|----------|-------------------------------------|

\*Double immunolabeling MUNC13-1/Cav2.1 in hippocampal cryosections

#Double immunolabeling MUNC13-2/Cav2.1 in hippocampal cryosections

Mann Whitney U test, exact significance (2-tailed). Significance threshold  $\alpha$  was set to 0.05. Only p values less than 0.05 were considered significant.

| Figure | Parameter                            | RIM-BP2 WT |         |    | RIM-BP2 KO |         |    | Lenti – RIM-BP2 |         |    | Statistic |     |   |        |                     |
|--------|--------------------------------------|------------|---------|----|------------|---------|----|-----------------|---------|----|-----------|-----|---|--------|---------------------|
|        |                                      | mean       | SEM     | n  | mean       | SEM     | n  | mean            | SEM     | n  | mean      | SEM | n | p      |                     |
| 5b     | Norm. EPSC amplitude                 | 1          | 0.1421  | 28 | 0.455      | 0.06115 | 42 | 1.062           | 0.1776  | 24 |           |     |   | 0.0001 | Kruskal-Wallis test |
| 5b     | DCG – norm. EPSC amplitude           | 0.1328     | 0.01832 | 28 | 0.1018     | 0.01508 | 42 | 0.1864          | 0.02359 | 24 |           |     |   | 0.0079 | Kruskal-Wallis test |
| 5d     | Norm. RRP                            | 1          | 0.1196  | 28 | 0.5447     | 0.06687 | 39 | 0.9098          | 0.1266  | 24 |           |     |   | 0.0076 | Kruskal-Wallis test |
| 5d     | Pvr                                  | 6.571      | 0.6293  | 28 | 5.148      | 0.708   | 37 | 4.75            | 0.592   | 24 |           |     |   | 0.0636 | Kruskal-Wallis test |
| 5f     | PPF                                  | 1.254      | 0.06607 | 28 | 1.514      | 0.06267 | 39 | 1.147           | 0.07206 | 24 |           |     |   | 0.0636 | Kruskal-Wallis test |
| 5h     | mEPSC frequency                      | 3.636      | 0.5308  | 28 | 3.487      | 0.4108  | 42 | 3.757           | 0.7147  | 24 |           |     |   | 0.8537 | Kruskal-Wallis test |
| 5h     | mEPSC amplitude                      | 32.03      | 2.521   | 28 | 29.62      | 2.04    | 42 | 34.16           | 3.435   | 24 |           |     |   | 0.5230 | Kruskal-Wallis test |
| S4b    | Norm. EPSC amplitude 10 Hz WT vs. KO | 1.259      | 0.148   | 28 | 0.864      | 0.1214  | 42 |                 |         |    |           |     |   | 0.0197 | Mann-Whitney test   |
| S4b    | Norm. EPSC amplitude 10 Hz WT vs. KO |            |         |    | 0.864      | 0.1214  | 42 | 1.317           | 0.1679  | 18 |           |     |   | 0.0178 | Mann-Whitney test   |
|        |                                      |            |         |    |            |         |    |                 |         |    |           |     |   |        |                     |



|    |                            | RIM-BP2 WT |         |    | RIM-BP2 KO |         |    | Lenti – M13 <sup>WT</sup> |         |    | Lenti – M13 <sup>K32E</sup> |         |    | Statistic |                     |
|----|----------------------------|------------|---------|----|------------|---------|----|---------------------------|---------|----|-----------------------------|---------|----|-----------|---------------------|
| 6b | Norm. EPSC amplitude       | 1.0        | 0.1224  | 49 | 0.5702     | 0.07643 | 47 | 0.6331                    | 0.08851 | 18 | 1.133                       | 0.1598  | 41 | 0.0012    | Kruskal-Wallis test |
| 6b | DCG – norm. EPSC amplitude | 0.4101     | 0.07456 | 49 | 0.2956     | 0.05211 | 44 | 0.4329                    | 0.07894 | 18 | 0.4154                      | 0.05772 | 41 | 0.2252    | Kruskal-Wallis test |
| 6d | Norm. RRP                  | 1          | 0.1315  | 41 | 0.5005     | 0.05583 | 38 | 0.6551                    | 0.1008  | 17 | 0.9669                      | 0.1197  | 39 | 0.0015    | Kruskal-Wallis test |
| 6d | Pvr                        | 4.394      | 0.5454  | 41 | 5.184      | 0.7666  | 38 | 4.764                     | 0.9743  | 16 | 5.015                       | 0.4566  | 37 | 0.5147    | Kruskal-Wallis test |
